# Supplementary material for: Large-scale speciation of selenium in rice proteins using ICP-MS assisted electrospray MS/MS proteomics
Source: Royal Society of Chemistry journal article supplement (doi:10.1039/c3mt00299c), 2014-01-01
Supplement: c3mt00299c.pdf [file c3mt00299c.pdf]

### Supplementary information

**Fig. 1S.** Example of ESI MS and MS/MS data for a selenized peptide with two possible S/Se substitution positions; (a) ESI MS spectrum at RT=22.5 min, (b) MS/MS fragmentation of GUELDNIMR peptide; (c) zoom of the MS/MS spectrum showing clear Se isotopic patterns of selenized fragments.

**Fig. 2S** Annotated fragmentation of selenized FEPCGLIQLQGMR (a,b) and MQCCQLQDVSR (c,d) peptides with both SeC/C (a,c) and SeM/M (b,d) substitution.

**Table 1S.** Summary of selenized peptides identified in the tryptic digest of the water soluble fraction (shotgun approach).

| nr | sequence              | z<br>(modification) | RT, min    |           | Theoretical<br>mass, Da | Experimental<br>mass, Da | $\Delta$ ,<br>ppm | protein     | AA |
|----|-----------------------|---------------------|------------|-----------|-------------------------|--------------------------|-------------------|-------------|----|
|    |                       |                     | Se-peptide | S-peptide |                         |                          |                   |             |    |
| 1  | EVQDSPLDACR           | 2 (non alk)         | 15.30      | 15.18     | 1336.511                | 1336.519                 | 5.77              | GL19_ORYSJ  | C  |
| 2  | MQCCQQLQDVSR          | 2 (non alk)         | 15.48      | 14.63     | 1599.600                | 1599.607                 | 4.82              | GL19_ORYSJ  | M  |
| 3  | QYAAQLPSMCR           | 2 (ox; non alk)     | 20.14      | 20.13     | 1371.546                | 1371.554                 | 5.62              | GL19_ORYSJ  | C  |
| 4  | QLAAVDSDWCR           | 2 (non alk)         | 21.03      | 20.98     | 1367.537                | 1367.531                 | 4.37              | RA5_ORYSJ   | C  |
| 5  | QYAAQLPSMCR           | 2 (ox; non alk)     | 21.12      | 20.13     | 1371.546                | 1371.554                 | 5.62              | GL19_ORYSJ  | M  |
| 6  | IYEAHVGMSEPEVSTYR     | 3                   | 21.67      | 20.84     | 2200.918                | 2200.919                 | 0.42              | GLGB_ORYSJ  | M  |
| 7  | VTYPIMADPSR           | 2                   | 21.84      | 20.92     | 1296.562                | 1296.557                 | 3.84              | REHYA_ORYSI | M  |
| 8  | FQPMFR                | 2 (ox)              | 23.28      | 22.62     | 872.3409                | 872.3486                 | 8.84              | GL19_ORYSJ  | M  |
| 9  | DAVMSTLGMTEDEK        | 2                   | 24.06      | 23.41     | 1444.566                | 1444.563                 | 2.20              | LEA3_ORYSI  | M  |
| 10 | ELGATDVGHPMAEVFPGCR   | 3 (non alk)         | 26.70      | 26.65     | 2089.879                | 2089.883                 | 1.69              | RAG2_ORYSJ  | C  |
| 11 | ELGATDVGHPMAEVFPGCR   | 3 (non alk)         | 27.66      | 26.65     | 2089.879                | 2089.883                 | 1.69              | RAG2_ORYSJ  | M  |
| 12 | CQPGMGYPMSLPR         | 2 (ox)              | 28.40      | 28.33     | 1703.67                 | 1703.666                 | 2.45              | RAG2_ORYSJ  | C  |
| 13 | CEAISHMLGGIYR         | 2                   | 28.10      | 28.03     | 1553.656                | 1553.654                 | 1.21              | RA5_ORYSJ   | C  |
| 14 | ELGAPDVGHPMSEVFR      | 2, 3                | 28.06      | 27.32     | 1787.775                | 1787.774                 | 0.38              | RA5_ORYSJ   | M  |
| 15 | CSALNHMVGGIYR         | 3                   | 28.08      | 28.02     | 1524.641                | 1524.639                 | 1.49              | RAG2_ORYSJ  | C  |
| 16 | CSALNHMVGGIYR         | 3                   | 29.45      | 28.54     | 1524.641                | 1524.642                 | 0.48              | RAG2_ORYSJ  | M  |
| 17 | CEAISHMLGGIYR         | 2                   | 29.53      | 28.67     | 1553.656                | 1553.656                 | 0.43              | RA5_ORYSJ   | M  |
| 18 | FEPGLIQLQGMR          | 2                   | 33.16      | 32.02     | 1595.703                | 1595.706                 | 1.77              | SSG1_ORYSI  | M  |
| 19 | FNAPLAHLIMAGADVLAVPSR | 3                   | 44.10      | 44.01     | 2210.111                | 2210.125                 | 5.98              | SSG1_ORYSI  | M  |
| 20 | FGIVEGLMTTVHAITATQK   | 3                   | 44.38      | 44.13     | 2064.016                | 2064.03                  | 6.75              | G3PC3_ORYSJ | M  |

**Table 2S.** Summary of selenized peptides identified in the tryptic digest of the GE protein spots (*cf.* Fig. 3)

**Spot 1: 19 kDa globulin**

| peak | RT, min | Sequence                                            | z (modifications) | Theoretical mass, Da | Experimental mass, Da | delta, ppm |
|------|---------|-----------------------------------------------------|-------------------|----------------------|-----------------------|------------|
| A    | 10.81   |                                                     |                   |                      |                       |            |
| B    | 15.03   | EVQDSPLDA <b>Se</b> CR                              | 2 (non alk)       | 1336.516             | 1336.518              | 1.74       |
| B    | 15.03   | MQ <b>Se</b> CCQQLQDVSR<br>MQC <b>Se</b> CCQQLQDVSR | 2 (ox)            | 1599.604             | 1599.605              | 0.61       |
| C    | 15.34   | <b>Se</b> MQCCQQLQDVSR                              | 2 (ox)            | 1599.604             | 1599.605              | 0.61       |
| D    | 17.35   | <b>Se</b> MQCCQQLQDVSR                              | 2 (one C non alk) | 1542.582             | 1542.583              | 0.83       |
| E    | 19.81   | QYAAQLPSM <b>Se</b> CR                              | 2                 | 1371.551             | 1371.553              | 1.77       |
| F    | 20.83   | QYAAQLPS <b>Se</b> MCR                              | 2 (ox)            | 1371.551             | 1371.555              | 2.83       |
| G    | 22.97   | FQP <b>Se</b> MFR                                   | 2 (ox)            | 872.3448             | 872.3482              | 4.17       |
| H    | 24.16   | QYAAQLPS <b>Se</b> MCR                              | 2 (non alk)       | 1314.529             | 1314.533              | 2.87       |

**Spot 7 : Glutelin type-A 1**

| peak | RT, min | Sequence                             | z (modifications) | Theoretical mass, Da | Experimental mass, Da | delta, ppm |
|------|---------|--------------------------------------|-------------------|----------------------|-----------------------|------------|
| A    | 10.68   | QLQ <b>Se</b> CQNDQR                 | 2 (non alk)       | 1236.4751            | 1236.478              | 2.81       |
| B    | 12.3    |                                      |                   |                      |                       |            |
| C    | 12.83   | ERYQEGGYQQSQYGSG <b>Se</b> CPN       | 3                 | 2315.8583            | 2315.863              | 2.05       |
| C    | 12.83   | YQEGQYQQSQYGSG <b>Se</b> CSN         | 2 (non alk)       | 2030.7146            | 2030.717              | 1.33       |
| D    | 25.9    |                                      |                   |                      |                       |            |
| E    | 30.44   |                                      |                   |                      |                       |            |
| F    | 31.84   | SQAGTTEFFDVSNEQFQ <b>Se</b> CTGVSVVR | 3                 | 2840.2156            | 2840.225              | 3.42       |
| H    | 41.48   |                                      |                   |                      |                       |            |

**Spot 5 : Glutelin type-A 2**

| peak | RT, min | Sequence                          | z (modifications) | Theoretical mass, Da | Experimental mass, Da | delta, ppm |
|------|---------|-----------------------------------|-------------------|----------------------|-----------------------|------------|
| A    | 10.68   | QLQ <b>Se</b> CQNDQR              | 2 (non alk)       | 1236.4751            | 1236.478              | 2.81       |
| G    | 32.71   | GLSLLQPYASLQEQEQGQ <b>Se</b> MQSR | 3 (ox)            | 2538.1618            | 2538.167              | 2.02       |

### Spot 12 :Glutelin type-A 2

| peak | RT, min | Sequence                    | z (modifications) | Theoretical mass, Da | Experimental mass, Da | delta, ppm |
|------|---------|-----------------------------|-------------------|----------------------|-----------------------|------------|
| A    | 10.66   | QLQSeCQNDQR                 | 2                 | 1236.475             | 1236.481              | 4.83       |
| B    | 13.1    | ASLQEQQGQSeMQSR             | 2 (ox)            | 1666.681             | 1666.684              | 1.51       |
| B    | 13.1    | EHYQEGGYQQSQYGSQSeCPN       | 2, 3 (non alk)    | 2235.8               | 2235.803              | 1.30       |
| C    | 27.04   |                             |                   |                      |                       |            |
| E    | 32.84   | GLSLLQPYASLQEQQGQSeMQSR     | 3 (ox)            | 2538.162             | 2538.167              | 2.26       |
| F    | 41.68   | SQAGTTEFFDVSNELFQSeCTGVSVVR | 3                 | 2825.241             | 2825.252              | 3.87       |

### Spot 6 : Glutelin type-B 4

| peak | RT, min | Sequence         | z (modifications) | Theoretical mass, Da | Experimental mass, Da | delta, ppm |
|------|---------|------------------|-------------------|----------------------|-----------------------|------------|
| D    | 28.7    | YSNTPGSeMVYIIQGR | 2 (ox)            | 1645.7367            | 1645.744              | 4.72       |

### Spot 2-3-4 : Granule-bound starch synthase

| peak | RT, min | Sequence                                | z<br>(modifications) | theoretical<br>mass, Da | experimental<br>mass, Da | delta,<br>ppm |
|------|---------|-----------------------------------------|----------------------|-------------------------|--------------------------|---------------|
| A    | 11.99   | S <b>SeM</b> E EKYPGK                   | 2                    | 1115.4402               | 1115.4392                | -0.86         |
| B    | 14.38   | TGFH <b>SeM</b> GR                      | 2                    | 852.3146                | 852.3188                 | 4.97          |
| B    | 14.38   | GFH <b>SeM</b> GR                       | 2                    | 751.2669                | 751.2682                 | 1.78          |
| C    | 16.22   | V <b>SeM</b> VISPR                      | 2                    | 848.4023                | 848.4038                 | 1.82          |
| D    | 17.55   | KINW <b>SeM</b> K                       | 2 (ox)               | 866.3918                | 866.3932                 | 1.66          |
| E    |         | IYGPDTGV <sup>DYK</sup> DNQ <b>SeMR</b> | 3 (ox)               | 1918.7964               | 1918.7985                | 1.12          |
| F    | 20.01   | INW <b>SeM</b> K                        | 2 (ox)               | 738.2968                | 738.2984                 | 2.22          |
| G    | 20.01   | N <b>SeC</b> MNQDLSWK                   | 2                    | 1342.4879               | 1342.4902                | 1.74          |
| H    | 21.14   | N <b>SeM</b> NQDLSWK                    | 2 (ox)               | 1342.4879               | 1342.4944                | 4.87          |
| I    | 21.14   | G <b>SeC</b> ELDNIMR                    | 2                    | 1154.4293               | 1154.4308                | 1.33          |
| J    | 22.44   | VVGTPAYEE <b>SeM</b> VR                 |                      | 1397.6094               | 1397.6122                | 2.03          |
| K    | 22.87   | GCELDNI <b>SeMR</b>                     | 2 (ox)               | 1154.4293               | 1154.4326                | 2.89          |
| L    | ND      | GLIQLQG <b>SeMR</b>                     | 2 (ox)               | 1062.5089               | 1062.5120                | 2.96          |
| M    | ND      | YGTP <b>SeC</b> ACASTGGLVDTVIEGK        | 2 (ox)               | 2202.9370               | 2202.9414                | 2.02          |
| N    | ND      | L <b>SeM</b> AGADVLAVPSR                | 2 (ox)               | 1459.7302               | 1459.7350                | 3.32          |
| O    | 31.88   | TGGLGDVLGGLPPA <b>SeMA</b> ANGHR        | 3                    | 2007.9393               | 2007.9417                | 1.22          |
| P    | 31.88   | FEP <b>SeC</b> GLIQLQGMR                | 2, 3                 | 1595.7033               | 1595.7058                | 1.59          |
| Q    | 32.52   | FEP <b>SeC</b> GLIQLQG <b>SeMR</b>      | 2, 3 (ox)            | 1595.7033               | 1595.7066                | 2.09          |
| R    | 32.52   | VAF <b>SeC</b> IHNISYQGR                | 2, 3                 | 1611.7061               | 1611.7023                | -2.33         |
| S    | 35.60   | LTGITGIVNG <b>SeM</b> DVSEWDPSKDK       | 3 (ox)               | 2409.0967               | 2409.1056                | 3.71          |
| T    | 38.26   | ATGAGMNVVFGAE <b>SeM</b> APWSK          | 2, 3 (ox)            | 2069.9148               | 2069.9218                | 3.40          |
| U    |         | GTYGEDVVFV <b>SeC</b> NDWHTGPLASYL<br>K | 3                    | 2775.2083               | 2775.2199                | 4.19          |
| V    | 43.72   | FNAPLAHL <b>SeM</b> AGADVLAVPSR         | 2, 3/(ox)            | 2210.1115               | 2210.1228                | 5.13          |
| W    | 45.10   |                                         |                      |                         |                          |               |
