# Supplementary figures and images for: Large-scale speciation of selenium in rice proteins using ICP-MS assisted electrospray MS/MS proteomics
Source: Royal Society of Chemistry journal article supplement (doi:10.1039/c3mt00299c), 2014-01-01

(a) Parent ion RT 22.5min, **GU**ELDNIMR z=2

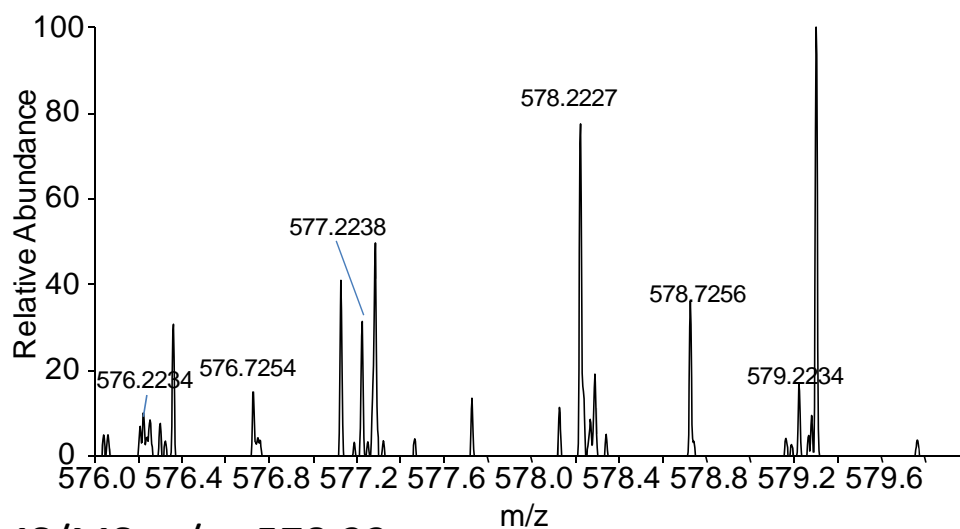

(b) MS/MS m/z= 578.22

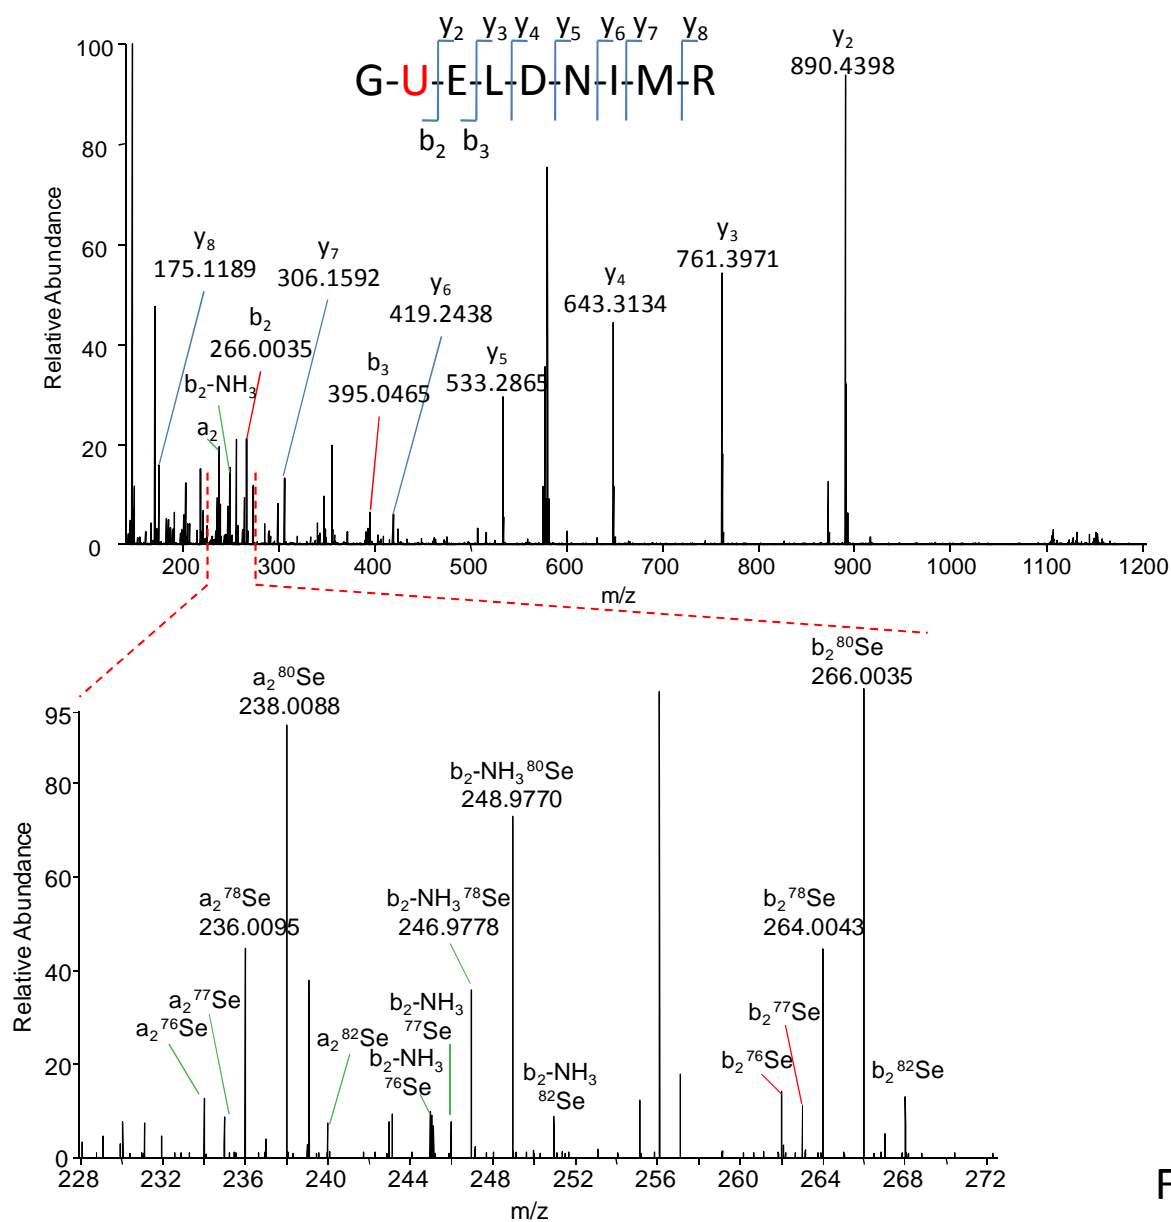

Fig. 1S

Supplement: c3mt00299c_2.pdf [file c3mt00299c_2.pdf]

(a)

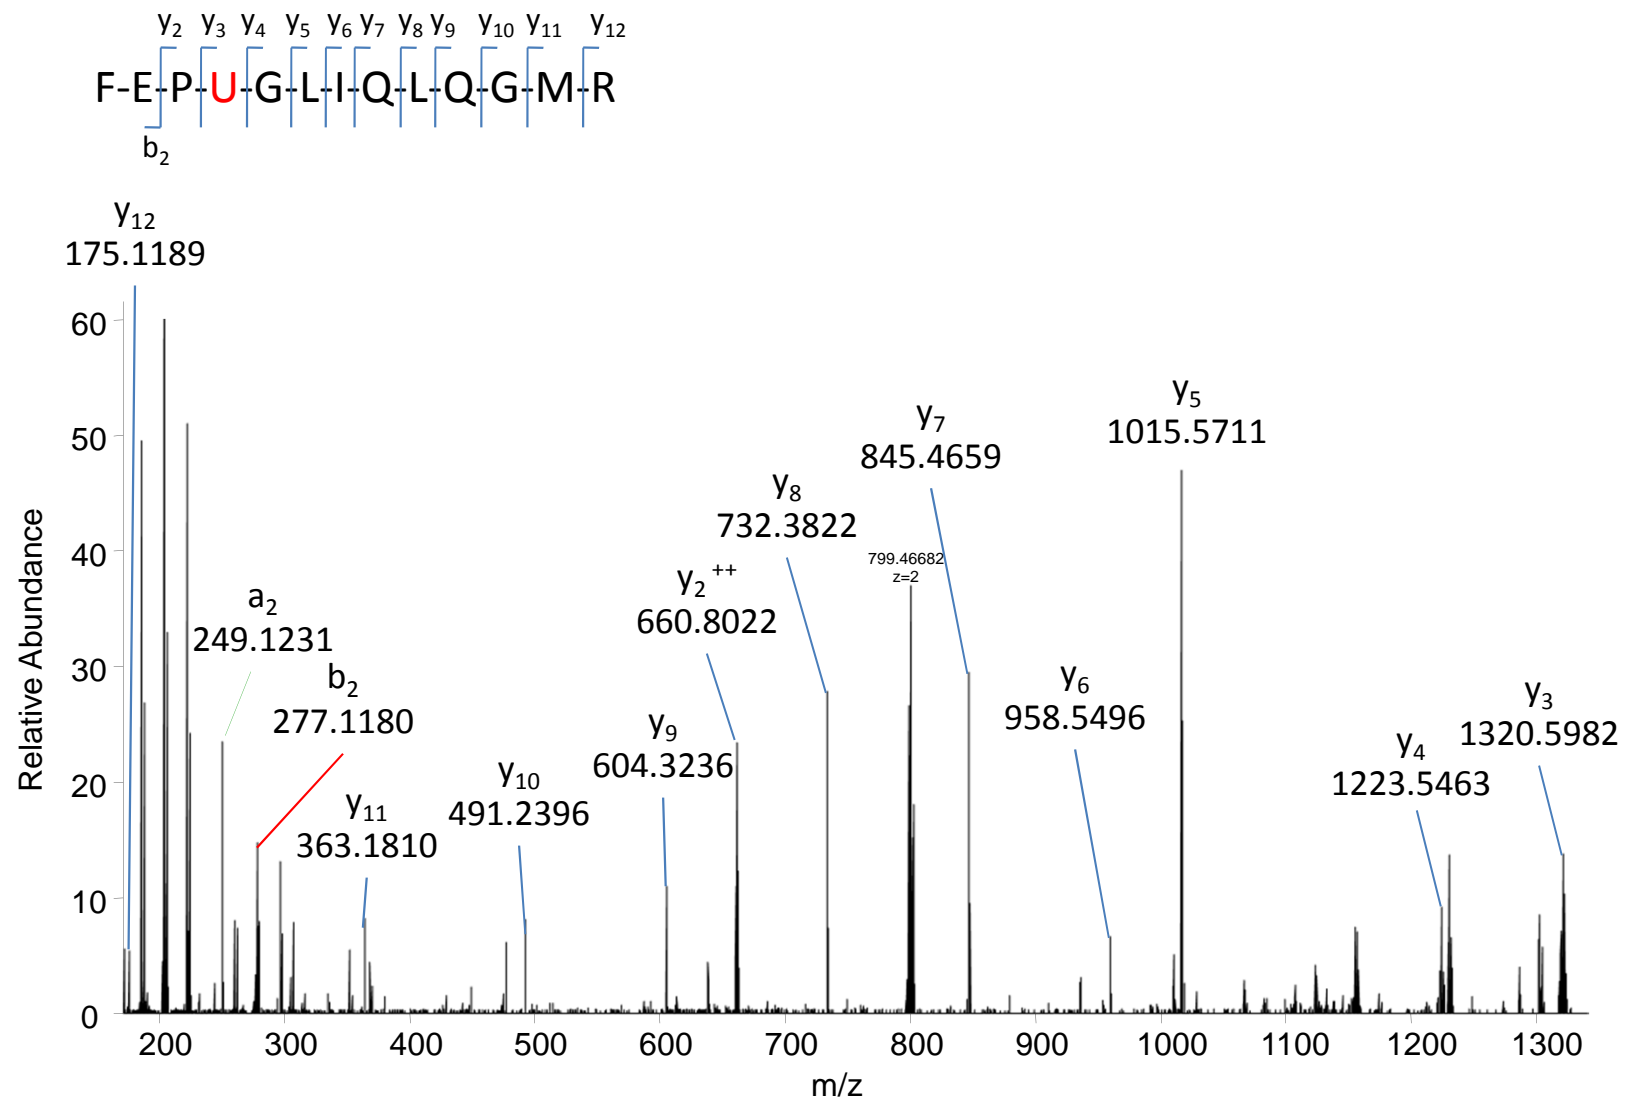

Fig. 2S

(b)

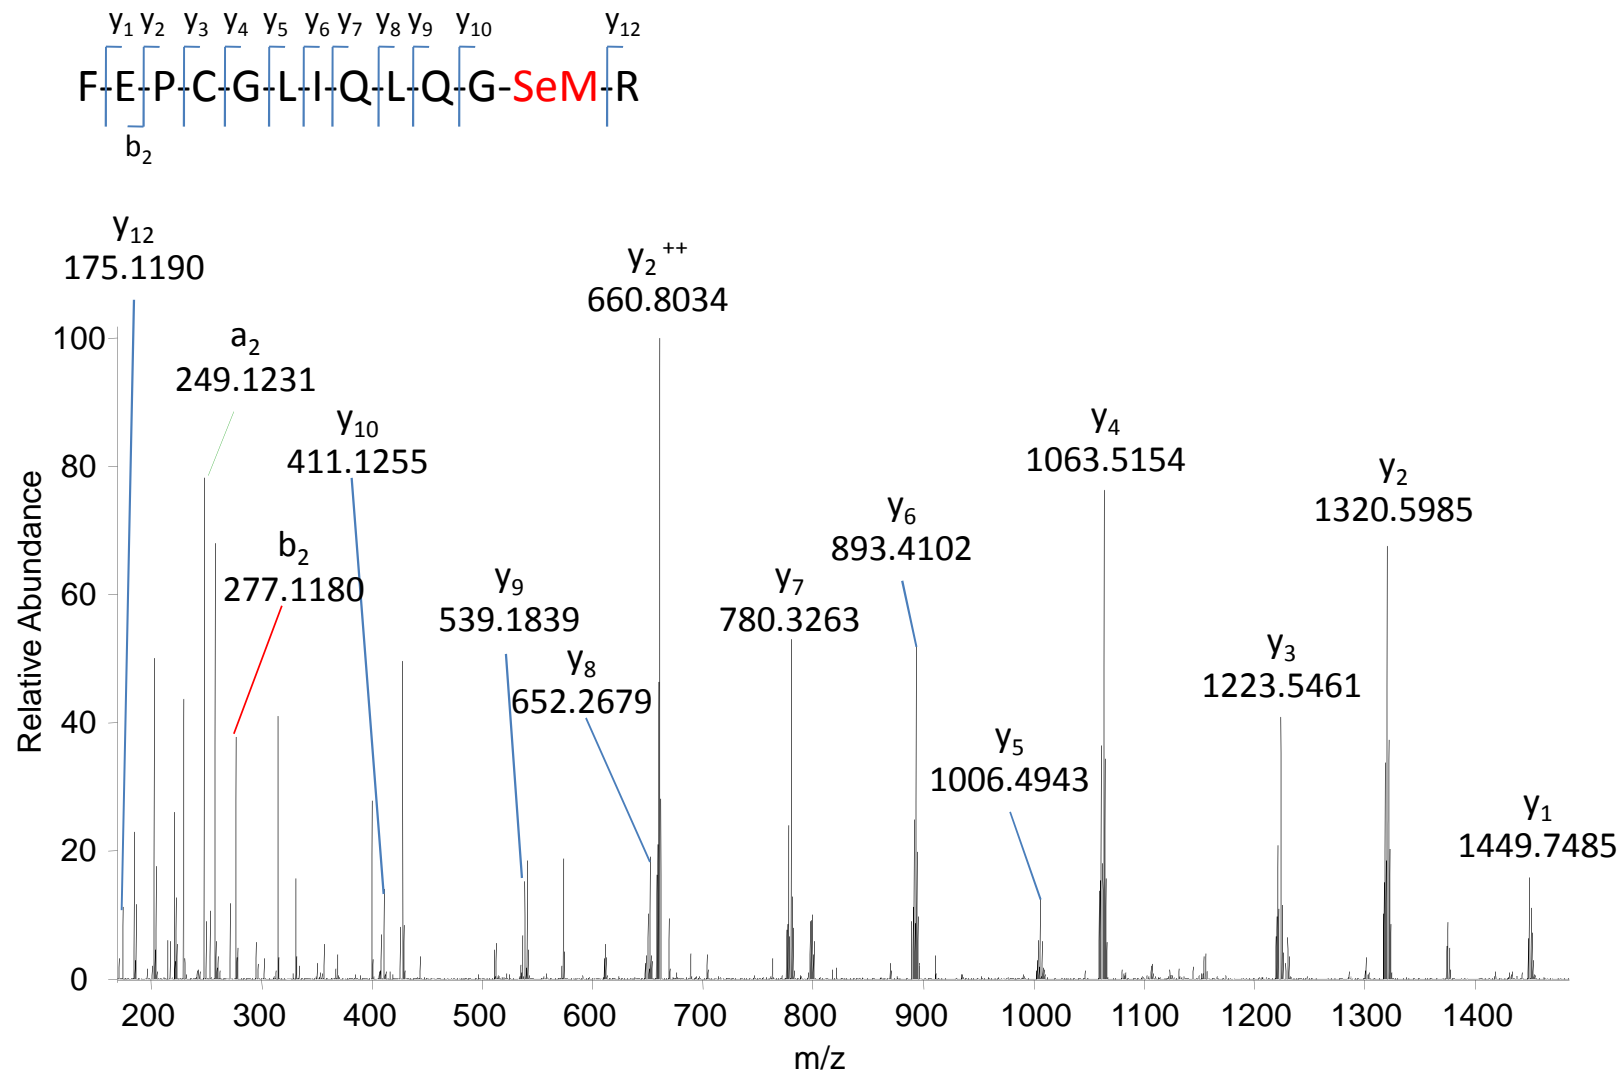

Fig. 2S

(c)

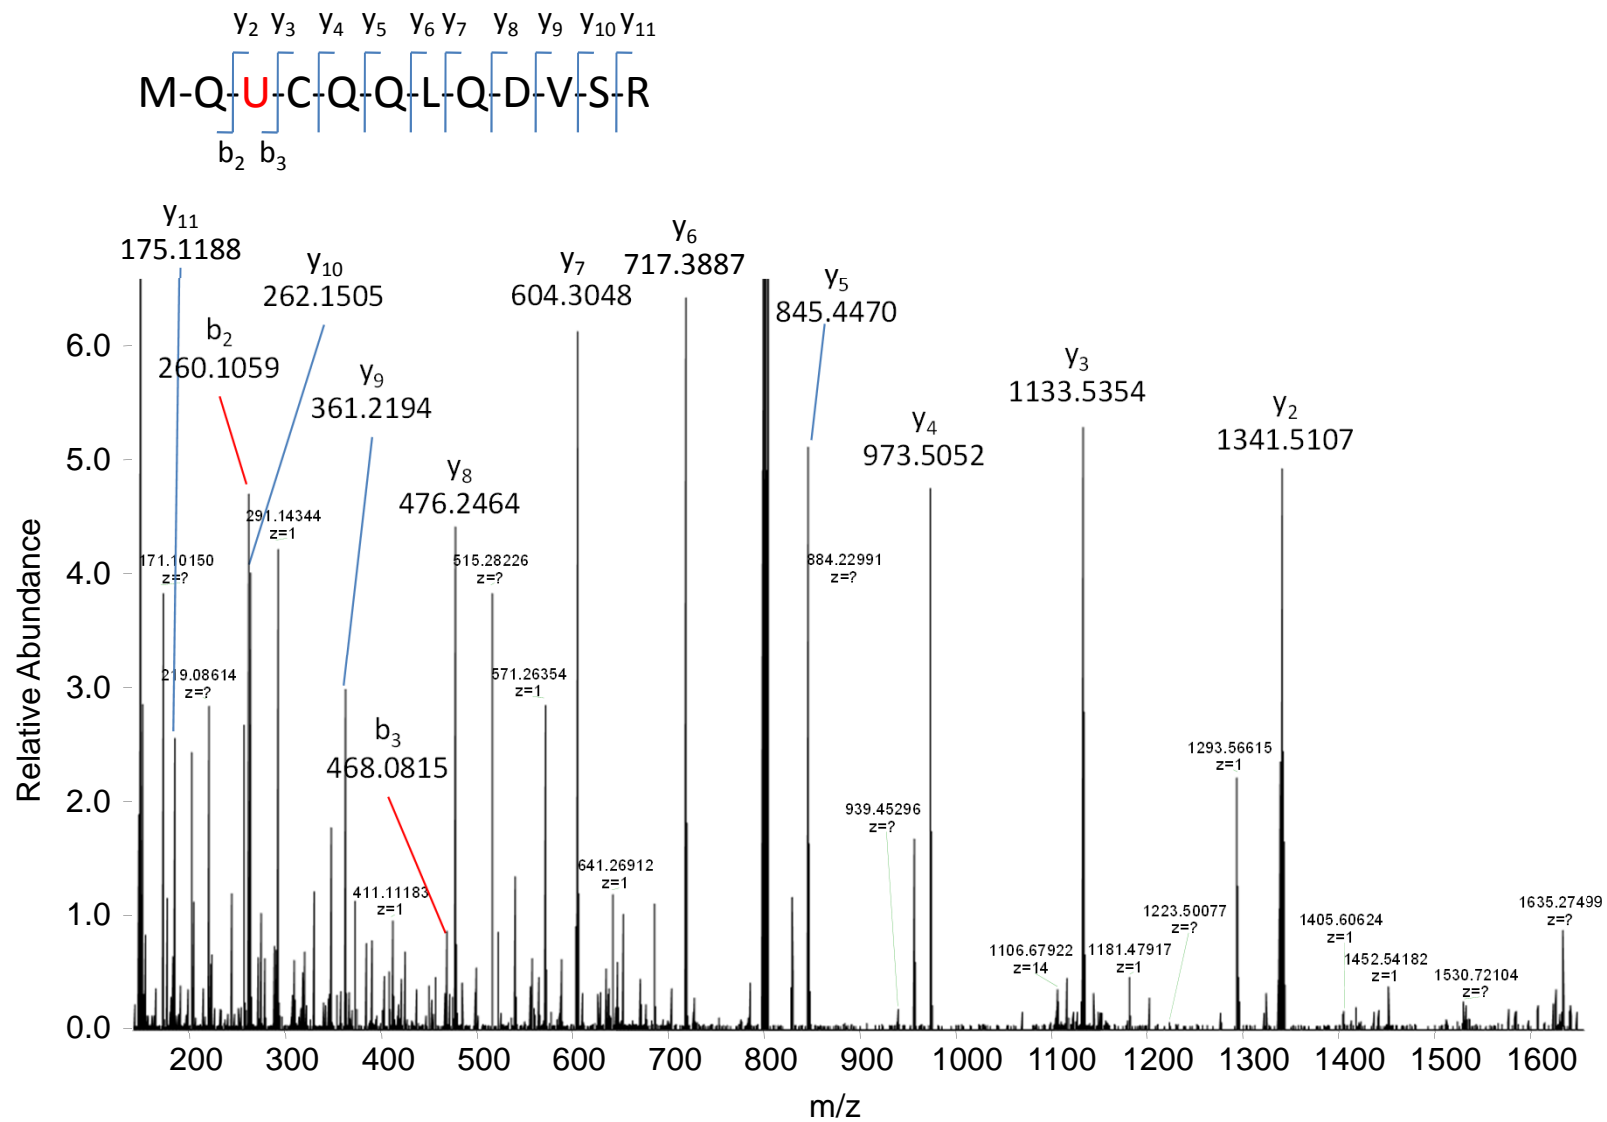

Fig. 2S

(d)

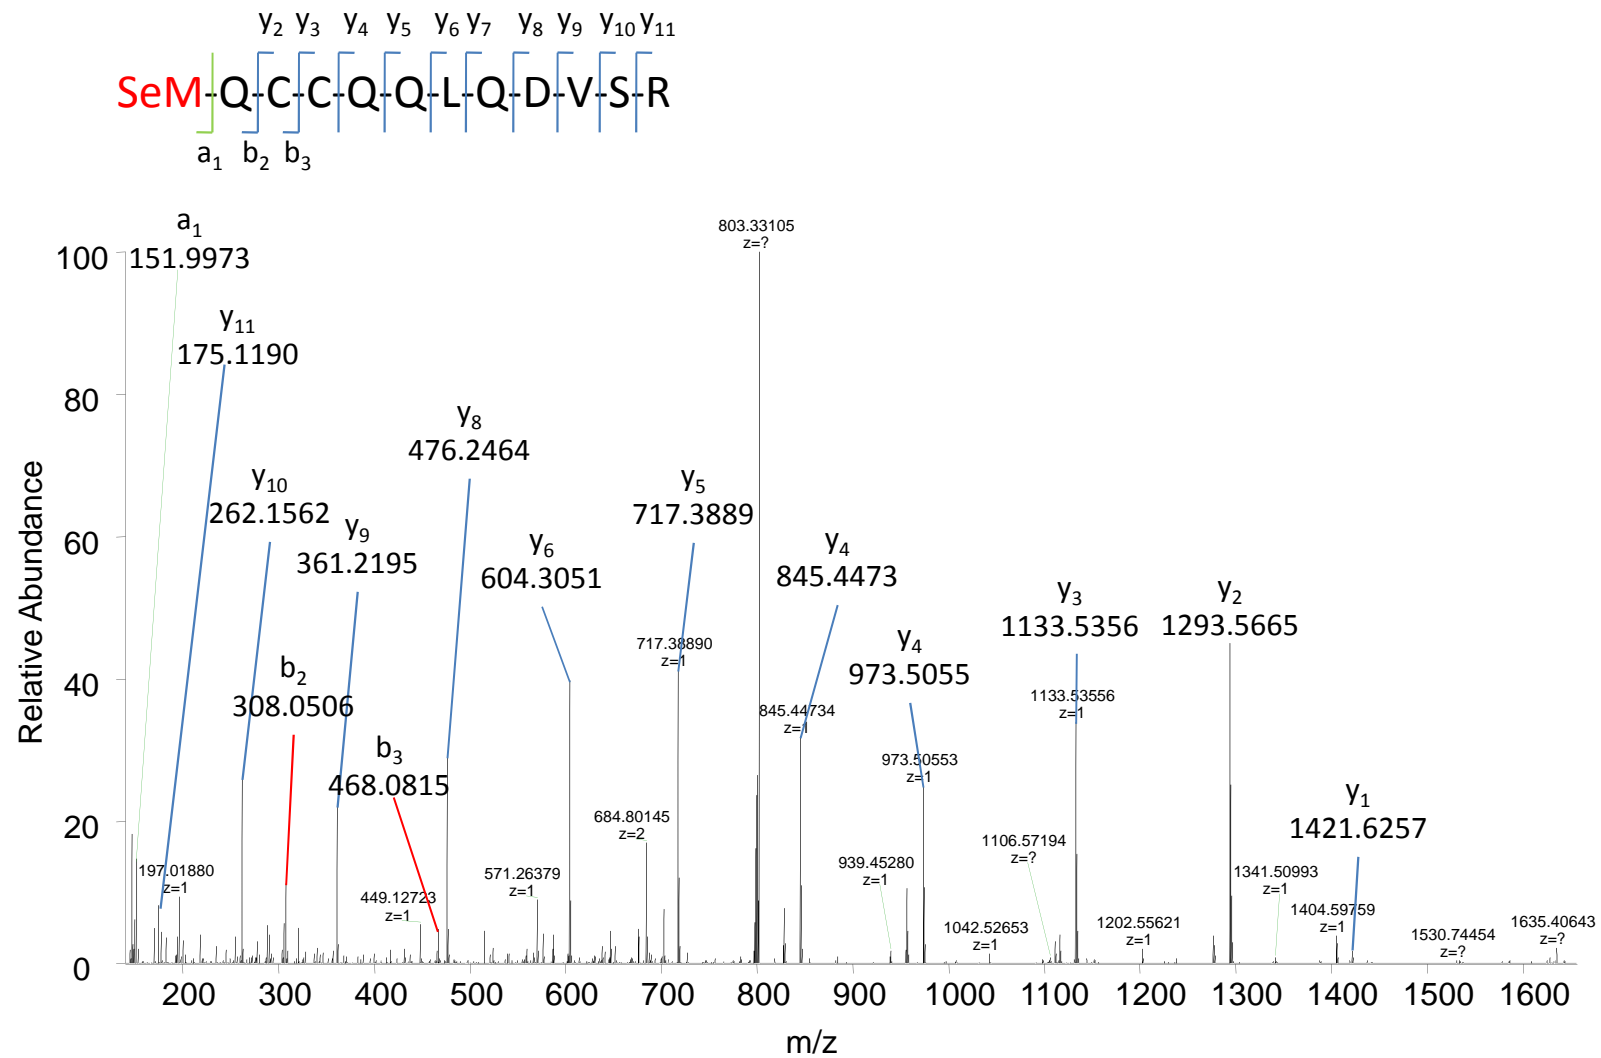

Fig. 2S

Supplement: c3mt00299c_3.pdf [file c3mt00299c_3.pdf]
